## Full Vector Ants

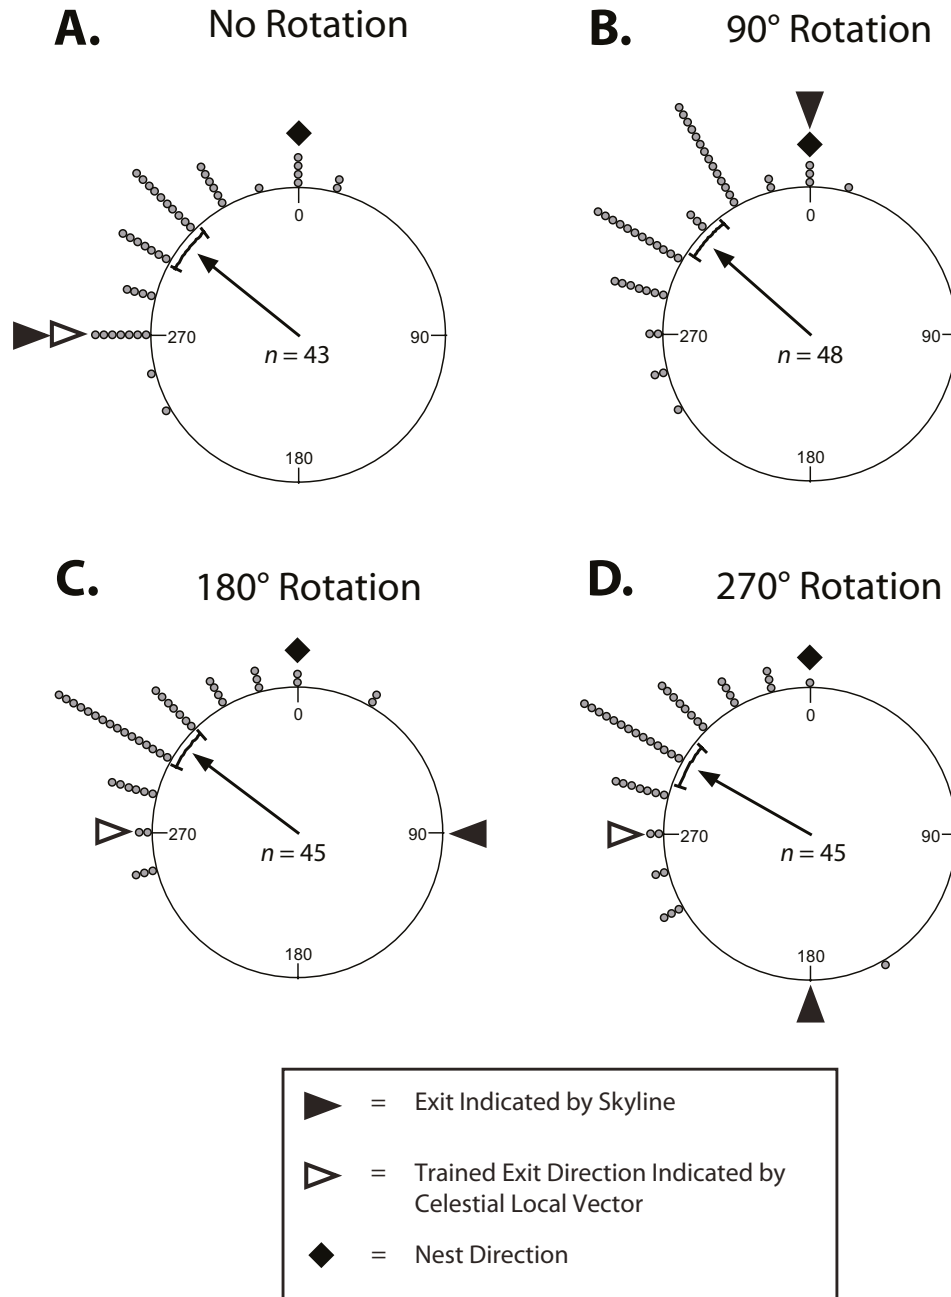

**Fig. S1.** Full-vector ant directional bearings for each test in Experiment 1. Grey circles indicate ants' directional bearings after crossing a marked goniometer line 30cm from a central release location. Open triangular markers indicate the nest direction. Black diamond markers indicates the trained exit direction of the arena according to a learned route (celestial local vector). Closed triangular markers indicate the exit direction according to ants' view-based navigational system (terrestrial panorama). Headers above each circular plot indicate the degree the testing arena was rotated relative to the orientation of the training arena. The 95% confidence interval of the mean is displayed as a curved marker on the inside of the circular plot.

**Table S1. Mean heading direction and scatter of full-vector ants in each arena**

---

| Arena rotation | Mean heading direction | Circular SD (scatter) |
|----------------|------------------------|-----------------------|
| 0 deg          | 308.76 deg             | 0.15                  |
| 90 deg         | 311.61 deg             | 0.16                  |
| 180 deg        | 307.29 deg             | 0.13                  |
| 270 deg        | 299.60 deg             | 0.15                  |

---
